# Supplementary material for: Supporting antidepressant discontinuation: the development and optimisation of a digital intervention for patients in UK primary care using a theory, evidence and person-based approach
Source: BMJ Open. 2020 Mar 8;10(3):e032312. doi: 10.1136/bmjopen-2019-032312 (PMC7064123; doi:10.1136/bmjopen-2019-032312)
Supplement: Supplementary data [file bmjopen-2019-032312supp003.pdf]

## Appendix C – Theoretical Modelling

| Intervention module                   | Page                          | Content                                                                                                                                                                                | Evidence:<br>Importance of barrier/facilitator content targets OR evidence for effectiveness of content                                                                                          | BCW construct        | BCW function                    | BCTs (Taxonomy V1)<br>Techniques broadly applied across content sections                                            | SCT construct<br>Constructs applied across content sections                                                         | NPT construct<br>Constructs applied across content sections                    |
|---------------------------------------|-------------------------------|----------------------------------------------------------------------------------------------------------------------------------------------------------------------------------------|--------------------------------------------------------------------------------------------------------------------------------------------------------------------------------------------------|----------------------|---------------------------------|---------------------------------------------------------------------------------------------------------------------|---------------------------------------------------------------------------------------------------------------------|--------------------------------------------------------------------------------|
| Reducing and stopping antidepressants | Welcome                       |                                                                                                                                                                                        |                                                                                                                                                                                                  |                      |                                 |                                                                                                                     |                                                                                                                     |                                                                                |
|                                       | Why should I reduce and stop? | Foster a motivation to withdraw through discussion of benefits, reduction of side effects, potential for increase in agency, potential for effective use of alternatives to medication | <i>Bosman et al. (2016); Dickinson et al. (2010); Verbeek-Heida and Mathot (2006); Iden et al. (2011); Karp (1993); Knudsen et al. (2002); Eveleigh (2015); Gibson (2016); Schofield (2011).</i> | Reflexive motivation | Enablement; training; education | 9.1 Credible source<br><br>9.2 Pros and cons<br><br>15.2. Persuasion about capability<br><br>13.2 Framing-reframing | Knowledge; social outcome expectations; physical outcome expectations; Self-efficacy (Somatic and emotional states) | Coherence: Individual specification<br><br>Cognitive participation: Initiation |
|                                       | The downsides                 | Reflection on the side effects of antidepressants as a means to foster motivation to withdraw                                                                                          |                                                                                                                                                                                                  | Reflexive motivation | Enablement; training; education |                                                                                                                     |                                                                                                                     |                                                                                |

|  |                                |                                                                                                                                                                                                       |                                               |                          |                                 |  |  |  |
|--|--------------------------------|-------------------------------------------------------------------------------------------------------------------------------------------------------------------------------------------------------|-----------------------------------------------|--------------------------|---------------------------------|--|--|--|
|  | When should I reduce and stop? | Highlighting that it is best to start withdrawal at a stable time in life                                                                                                                             |                                               | Psychological capability | Enablement; training; education |  |  |  |
|  | What to expect                 | Outline the discontinuation process: that the GP will provide a schedule, that this is flexible and that there may be side effects but there are ways to manage these and they are often short-lived. |                                               | Psychological capability | Enablement; training; education |  |  |  |
|  | Addressing concerns            | Briefly acknowledges that many people have concerns about withdrawal but that there are techniques for dealing with this in AD-visor                                                                  |                                               | Psychological capability | Enablement; training; education |  |  |  |
|  | How can my GP help?            | Outline the role of the GP in discontinuation,                                                                                                                                                        | <i>Bosman et al. (2016); Dickenson et al.</i> | Physical capability      | Enablement; training; education |  |  |  |
|  |                                |                                                                                                                                                                                                       |                                               |                          |                                 |  |  |  |

|                                      |                                 |                                                                                                                 |                                                                                                                                        |                      |                                 |                                                      |                                        |                                     |
|--------------------------------------|---------------------------------|-----------------------------------------------------------------------------------------------------------------|----------------------------------------------------------------------------------------------------------------------------------------|----------------------|---------------------------------|------------------------------------------------------|----------------------------------------|-------------------------------------|
|                                      |                                 | when to go to the GP for support.                                                                               | 2010; Grime & Pollock (2003); Verbeek-Heida and Mathot (2006); Eveleigh (2015); Gibson (2016); Leydon et al. (2007); Cartwright (2016) |                      |                                 |                                                      |                                        |                                     |
|                                      |                                 |                                                                                                                 |                                                                                                                                        |                      |                                 |                                                      |                                        |                                     |
|                                      | Planning ahead                  | Overview of the process: GP will give schedule and as one tapers, there is support in AD-visor that can be used |                                                                                                                                        | Reflexive motivation | Enablement; training; education |                                                      |                                        |                                     |
|                                      | Support from family and friends | Highlight how friends and family members can play and important role                                            | Bosman et al. (2016); Cromartry (2011); Verbeek-Heida and Mathot (2006); Eveleigh (2015)                                               | Social opportunity   | Enablement; training; education | 3.1 Social support<br>3.3 Social support (emotional) |                                        |                                     |
| <b>How to reduce antidepressants</b> | How to reduce                   | Practical information about tapering schedules                                                                  |                                                                                                                                        | Physical capability  | Enablement; training; education | 4.1 Instructions on how to perform behaviour         | Self-efficacy (Mastery experiences/vic | Coherence: Individual specification |
|                                      |                                 |                                                                                                                 |                                                                                                                                        |                      |                                 |                                                      |                                        |                                     |

|                                       |                           |                                                                                                                                                                             |                                                                                                                                                                                                 |                          |                                                              |                                                                 |                                                                       |                            |
|---------------------------------------|---------------------------|-----------------------------------------------------------------------------------------------------------------------------------------------------------------------------|-------------------------------------------------------------------------------------------------------------------------------------------------------------------------------------------------|--------------------------|--------------------------------------------------------------|-----------------------------------------------------------------|-----------------------------------------------------------------------|----------------------------|
|                                       | How to reduce (2)         | Highlight that there is unlikely to be a need for liquid formulations or pill cutters but if needed, the GP can offer some guidance (perhaps via community pharmacist)      |                                                                                                                                                                                                 | Physical capability      | Environmental restructuring; Enablement; training; education | 6.1 Demonstration of behaviour (modelling)                      | arious experiences).                                                  |                            |
|                                       | When to reduce            | Reiterate that there are ideal times to begin tapering, such as when no major life events are expected                                                                      |                                                                                                                                                                                                 | Psychological capability | Enablement; training; education                              |                                                                 |                                                                       |                            |
| <b>Thinking about antidepressants</b> | What are antidepressants? | Briefly explains what antidepressants are used for. Highlights that while it was believed they work through increasing serotonin, we now know it is more complex than that. | <i>Bosman et al. (2016); Dickenson et al. 2010; Grime &amp; Pollock (2003); Verbeek-Heida and Mathot (2006); Karp (1993); Knudsen et al. (2002); Eveleigh (2015); Gibson (2016); Cartwright</i> | Reflexive motivation     | Enablement; training; education                              | 13.2 Framing/reframing<br><br>15.2. Persuasion about capability | Social outcome expectations; Knowledge; physical outcome expectations | Coherence: Internalisation |

|  |                                 |                                                                                                                                                                                                    |                               |                      |                                 |  |  |  |
|--|---------------------------------|----------------------------------------------------------------------------------------------------------------------------------------------------------------------------------------------------|-------------------------------|----------------------|---------------------------------|--|--|--|
|  | Can I stop taking them?         | Key point: even though we don't know exactly <i>how</i> they work, we do know that many people can successfully discontinue                                                                        | (2016); Leydon et al. (2007). | Reflexive motivation | Enablement; training; education |  |  |  |
|  | Other forms of 'antidepressant' | There are things other than medication which can improve mood. The relationship between brain and behaviour is highlighted through a study which shows that CBT can result in changes in the brain |                               | Reflexive motivation | Enablement; training; education |  |  |  |
|  | How to antidepressants work     | Highlights again that we don't know exactly how they work but we do know: ADs help some people and not others and many                                                                             |                               | Reflexive motivation | Enablement; training; education |  |  |  |
|  |                                 |                                                                                                                                                                                                    |                               |                      |                                 |  |  |  |

|                                   |                                           | people can successfully stop.                                                                                                         |                                                                                                                                                                                                                 |                          |                                 |                                                                 |                                                                                                                                                    |                                                                                |
|-----------------------------------|-------------------------------------------|---------------------------------------------------------------------------------------------------------------------------------------|-----------------------------------------------------------------------------------------------------------------------------------------------------------------------------------------------------------------|--------------------------|---------------------------------|-----------------------------------------------------------------|----------------------------------------------------------------------------------------------------------------------------------------------------|--------------------------------------------------------------------------------|
| <b>I'm worried about stopping</b> | I'm worried about stopping                | Highlight that many people have concerns about stopping and this is understandable and does not mean you won't be able to discontinue | Bosman et al. (2016); Dickinson et al. (2010); Verbeek-Heida and Mathot (2006); Iden et al. (2011); Karp (1993); Knudsen et al. (2002); Eveleigh (2015); Gibson (2016); Schofield (2011); Leydon et al. (2007). | Psychological capability | Enablement; training; education | 13.2 Framing/reframing<br><br>15.2. Persuasion about capability | Knowledge, Self-efficacy (Mastery experiences vicarious experiences).<br><br>Social outcome expectations; Knowledge; physical outcome expectations | Cognitive participation: Initiation<br><br>Cognitive participation: Activation |
|                                   | Successful stopping                       | Indicate that many people stop SD without problems, and those who are worried can overcome their concerns                             |                                                                                                                                                                                                                 | Psychological capability | Enablement; training; education |                                                                 |                                                                                                                                                    |                                                                                |
|                                   | Concerns about stopping                   | Patients will be given a selection of options to click on to read more about specific concerns                                        |                                                                                                                                                                                                                 | Psychological capability | Enablement; training; education |                                                                 |                                                                                                                                                    |                                                                                |
|                                   | How will I cope if something big happens? | Reassure that AD-visor has guidance on managing stress in difficult                                                                   |                                                                                                                                                                                                                 | Psychological capability | Enablement; training; education |                                                                 |                                                                                                                                                    |                                                                                |

|  |                                                                    |                                                                                                                                                                                      |  |                             |                                       |  |  |  |
|--|--------------------------------------------------------------------|--------------------------------------------------------------------------------------------------------------------------------------------------------------------------------------|--|-----------------------------|---------------------------------------|--|--|--|
|  |                                                                    | situations.<br>Signpost to<br>Moving Forward<br>module.                                                                                                                              |  |                             |                                       |  |  |  |
|  | What if I go<br>back to<br>how I was<br>before?                    | Reassure that<br>AD-visor has<br>guidance on<br>preventing<br>relapse and<br>signpost to<br>Keeping Well<br>module.                                                                  |  | Psychological<br>capability | Enablement;<br>training;<br>education |  |  |  |
|  | What if I<br>have to<br>start taking<br>antidepress<br>ants again? | Reassure that<br>hopefully this<br>won't be<br>necessary<br>because they<br>will learn how<br>to prevent<br>relapse, but if it<br>is, they can try<br>withdrawing<br>again in future |  | Psychological<br>capability | Enablement;<br>training;<br>education |  |  |  |
|  | How will I<br>manage my<br>responsibili<br>ties?                   | Guidance on<br>planning<br>activities and<br>highlight the<br>importance<br>family support<br>as well as the<br>timing of the<br>tapering process                                    |  | Psychological<br>capability | Enablement;<br>training;<br>education |  |  |  |

|              |                       |                                                                                                 |                                                                                        |                          |                                 |                                                                                       |                                                                                                                                                            |                                     |
|--------------|-----------------------|-------------------------------------------------------------------------------------------------|----------------------------------------------------------------------------------------|--------------------------|---------------------------------|---------------------------------------------------------------------------------------|------------------------------------------------------------------------------------------------------------------------------------------------------------|-------------------------------------|
|              | Dealing with worries  | Reflecting on the motivations to discontinue and weighing these up against concerns.            |                                                                                        | Reflexive motivation     | Enablement; training; education |                                                                                       |                                                                                                                                                            |                                     |
| Keeping well | Keeping well          | Introduce to the idea of relapse prevention                                                     | Kuyken (2008); Allen (2009); Kuyken (2010); Fava (1998); Cromarty (2011); Otto (2010); | Psychological capability | Enablement; training; education | 11.2 Reduce negative emotions                                                         | Knowledge, Goals<br>Self-efficacy (Mastery experiences vicarious experiences).<br><br>Social outcome expectations; Knowledge; physical outcome expectation | Cognitive participation: Activation |
|              | Automatic pilot       | Define running on autopilot and explain negative automatic thoughts                             |                                                                                        | Psychological capability | Enablement; training; education | 13.2 Framing/reframing<br><br>6.1 Demonstration of behaviour<br><br>4.3 Reattribution |                                                                                                                                                            |                                     |
|              | The power of thoughts | Explain how the way we think impacts mood and teach cognitive defusion (thoughts are not facts) |                                                                                        | Psychological capability | Enablement; training; education |                                                                                       |                                                                                                                                                            |                                     |
|              | Let it be             | Defining the term 'acceptance' and why it is useful in dealing                                  |                                                                                        | Psychological capability | Enablement; training; education |                                                                                       |                                                                                                                                                            |                                     |

|  |                           |                                                                                                                                                        |  |                          |                                 |  |  |  |
|--|---------------------------|--------------------------------------------------------------------------------------------------------------------------------------------------------|--|--------------------------|---------------------------------|--|--|--|
|  |                           | with difficult thoughts and feelings                                                                                                                   |  |                          |                                 |  |  |  |
|  | Recognising warning signs | Explaining and reflecting on what thoughts and physical sensations might be indicators of relapse                                                      |  | Psychological capability | Enablement; training; education |  |  |  |
|  | Recognising triggers      | Reflecting on situations that might trigger a relapse                                                                                                  |  | Psychological capability | Enablement; training; education |  |  |  |
|  | Recognising relapse       | Writing down warning signs and triggers and saving these to view later                                                                                 |  | Psychological capability | Enablement; training; education |  |  |  |
|  | Responding differently    | Highlight that you cannot change thoughts or the things that happen in life, but you have a choice how to respond to these. Responding in more helpful |  | Psychological capability | Enablement; training; education |  |  |  |
|  |                           |                                                                                                                                                        |  |                          |                                 |  |  |  |

|                                           |                    |                                                                                                                                      |                                        |                          |                                 |                                |                  |                            |
|-------------------------------------------|--------------------|--------------------------------------------------------------------------------------------------------------------------------------|----------------------------------------|--------------------------|---------------------------------|--------------------------------|------------------|----------------------------|
|                                           |                    | ways can prevent relapse.                                                                                                            |                                        |                          |                                 |                                |                  |                            |
|                                           | Preventing relapse | <ol style="list-style-type: none"> <li>1. Take a breath</li> <li>2. Make a decision on how to act</li> <li>3. Take action</li> </ol> |                                        | Psychological capability | Enablement; training; education |                                |                  |                            |
| <b>Living life with values and goals*</b> | What are values    | Defines values as like a compass point providing direction for our lives.                                                            | Swain et al. 2013; Powers et al. 2009. | Psychological capability | Enablement; training; education | 11.2 Reduce negative emotions  | Knowledge, Goals | Coherence: Internalisation |
|                                           | What do I value?   | Provides a space to write down what they value                                                                                       |                                        | Psychological capability | Enablement; training; education | 13.2 Framing/reframing         |                  |                            |
|                                           | Goals              | Explaining the need to set goals in order to                                                                                         |                                        | Psychological capability | Enablement; training; education | 6.1 Demonstration of behaviour |                  |                            |

|                                         |                                 |                                                                                                                                                     |                                                                                                                                                                                                                       |                                                 |                                 |                                                              |                                                                       |                                     |
|-----------------------------------------|---------------------------------|-----------------------------------------------------------------------------------------------------------------------------------------------------|-----------------------------------------------------------------------------------------------------------------------------------------------------------------------------------------------------------------------|-------------------------------------------------|---------------------------------|--------------------------------------------------------------|-----------------------------------------------------------------------|-------------------------------------|
|                                         |                                 | act in line with our values                                                                                                                         |                                                                                                                                                                                                                       |                                                 |                                 | 4.3 Reattribution                                            |                                                                       |                                     |
|                                         | Setting goals                   | Guidance and space to write goals                                                                                                                   |                                                                                                                                                                                                                       | Psychological capability                        | Enablement; training; education |                                                              |                                                                       |                                     |
|                                         | Meeting goals                   | Reminds users to revisit this section to review their goals and see if they have met them                                                           |                                                                                                                                                                                                                       | Psychological capability                        | Enablement; training; education |                                                              |                                                                       |                                     |
| <b>Dealing with withdrawal symptoms</b> | What are withdrawal symptoms?   | Describes what they are and that they are a consequence of the brain and body adapting to the change in medication                                  | <i>Bosman et al. (2016); Dickinson et al. (2010); Verbeek-Heida and Mathot (2006); Iden et al. (2011); Karp (1993); Knudsen et al. (2002); Eveleigh (2015); Gibson (2016); Schofield (2011); Leydon et al. (2007)</i> | Psychological capability<br>Physical capability | Enablement; training; education | 13.2 Framing/reframing<br><br>6.1 Demonstration of behaviour | Social outcome expectations; Knowledge; physical outcome expectations | Cognitive participation: Activation |
|                                         | Recognising withdrawal symptoms | This page highlights that there are different symptoms that might be physical or mental. Specific details of what symptoms may occur are not given. |                                                                                                                                                                                                                       | Psychological capability<br>Physical capability | Enablement; training; education | 4.3 Reattribution                                            |                                                                       |                                     |

|  |                                    |                                                                                                                                                                                      |  |                                                 |                                 |  |  |  |
|--|------------------------------------|--------------------------------------------------------------------------------------------------------------------------------------------------------------------------------------|--|-------------------------------------------------|---------------------------------|--|--|--|
|  | Thinking about withdrawal symptoms | Explains that the way we think about symptoms can change how much impact they have (e.g. if you mistake a withdrawal symptom for relapse, it may be harder for the symptom to pass). |  | Psychological capability<br>Physical capability | Enablement; training; education |  |  |  |
|  | Knowing the difference             | Details about the differences between withdrawal symptoms and relapse.                                                                                                               |  | Psychological capability<br>Physical capability | Enablement; training; education |  |  |  |
|  | Dealing with withdrawal symptoms   | Mild symptoms can be tolerated and will pass, moderate symptoms can be treated by a doctor, and severe symptoms may indicate a slower taper is needed.                               |  | Psychological capability<br>Physical capability | Enablement; training; education |  |  |  |
|  |                                    |                                                                                                                                                                                      |  |                                                 |                                 |  |  |  |

|                       | Accepting withdrawal symptoms                                                                            | Guidance on accepting/tolerating symptoms based on acceptance and commitment exercises used with chronic physical symptoms                                                                                                                                                           |                                          | Psychological capability<br>Physical capability | Enablement; training; education |                                                                                                                            |                                                                                                                                                          |                                                                                                                                                             |
|-----------------------|----------------------------------------------------------------------------------------------------------|--------------------------------------------------------------------------------------------------------------------------------------------------------------------------------------------------------------------------------------------------------------------------------------|------------------------------------------|-------------------------------------------------|---------------------------------|----------------------------------------------------------------------------------------------------------------------------|----------------------------------------------------------------------------------------------------------------------------------------------------------|-------------------------------------------------------------------------------------------------------------------------------------------------------------|
| <b>Moving forward</b> | Healthy Paths Through Stress intervention (Healthy Paths). See Geraghty et al. 2017 for full description | This module is based on an intervention aimed at managing life stresses. The modules have been developed as part of a separate project and their content will be incorporated into AD-visor. This section will include guidance on mindfulness practices and behavioural activation. | Muñoz et al. 2005; Geraghty et al. 2016. | Psychological capability                        | Enablement; training; education | 11.2 Reduce negative emotions<br><br>13.2 Framing/reframing<br><br>6.1 Demonstration of behaviour<br><br>4.3 Reattribution | Knowledge, Goals Self-efficacy (Mastery experiences vicarious experiences).<br><br>Social outcome expectations; Knowledge; physical outcome expectations | Coherence: Individual specification<br><br>Coherence: Internalisation<br><br>Cognitive participation: Initiation<br><br>Cognitive participation: Activation |

**New references added:**

- Bosman, R. C., Huijbregts, K. M., Verhaak, P. F. M., Ruhé, H. G., Van Marwijk, H. W. J., Van Balkom, A. J. L. M., & Batelaan, N. M. (2016). Long-term antidepressant use: A qualitative study on perspectives of patients and GPs in primary care. *British Journal of General Practice*, 66(651), e708–e719. <https://doi.org/10.3399/bjgp16X686641>
- Cartwright, C., Gibson, K., & Read, J. (2016). Long-term antidepressant use : patient perspectives of benefits and adverse effects, 1401–1407. <https://doi.org/10.2147/PPA.S110632>
- Cromarty, P., Jonsson, J., Moorhead, S., & Freeston, M. H. (2011). Cognitive Behaviour Therapy for Withdrawal from Antidepressant Medication: A Single Case Series. *Behavioural and Cognitive Psychotherapy*, 39(01), 77–97. <https://doi.org/10.1017/S1352465810000512>
- Dickinson, R., Knapp, P., House, A. O., Dimri, V., Zermansky, A., Petty, D., ... Raynor, D. K. (2010). Long-term prescribing of antidepressants in the older population: A qualitative study. *British Journal of General Practice*, 60(573), 257–259. <https://doi.org/10.3399/bjgp10X483913>
- Eveleigh, R. H. (2015). *Inappropriate long-term antidepressant use in primary care: A challenge to change*. Radboud University Nijmegen. <https://doi.org/10.1063/1.3033202>
- Fava, G. A., Rafanelli, C., Grandi, S., Conti, S., & Belluardo, P. (1998). Prevention of Recurrent Depression With Cognitive Behavioral Therapy. *Arch Gen Psychiatry*, 55, 816–820.
- Geraghty, A. W. A., Muñoz, R. F., Yardley, L., Mc Sharry, J., Little, P., & Moore, M. (2016). Developing an Unguided Internet-Delivered Intervention for Emotional Distress in Primary Care Patients: Applying Common Factor and Person-Based Approaches. *JMIR Ment Health*, 3(4), e53.
- Gibson, K., Cartwright, C., & Read, J. (2016). “In my life antidepressants have been..”: A qualitative analysis of users’ diverse experiences with antidepressants. *BMC Psychiatry*, 16(1), 1–7. <https://doi.org/10.1186/s12888-016-0844-3>
- Grime, K. P. J. (2002). Understanding Depression and its Treatment: GP, Patient and Pharmacist Perspectives, (September), 52–60. Retrieved from [http://www.pharmacyresearchuk.org/waterway/wp-content/uploads/2012/11/Understanding\\_depression\\_and\\_its\\_treatment1.pdf](http://www.pharmacyresearchuk.org/waterway/wp-content/uploads/2012/11/Understanding_depression_and_its_treatment1.pdf)
- Iden, K. R., Hjørleifsson, S., & Ruths, S. (2011). Treatment decisions on antidepressants in nursing homes: A qualitative study. *Scandinavian Journal of Primary Health Care*, 29(4), 252–256. <https://doi.org/10.3109/02813432.2011.628240>
- Karp, D. A. (1993). Taking anti-depressant medications: Resistance, trial commitment, conversion, disenchantment. *Qualitative Sociology*, 16(4), 337–359. <https://doi.org/10.1007/BF00989969>
- Knudsen, P., Hansen, E. H., Traulsen, J. M., & Eskildsen, K. (2002). Changes in Self-Concept While Using SSRI Antidepressants. *Qualitative Health Research*, 12(7), 932–944. <https://doi.org/10.1177/104973202129120368>

- Kuyken, W., Byford, S., Watkins, E., Holden, E., White, K., King's, B. B., ... Teasdale, J. D. (2008). Mindfulness-Based Cognitive Therapy to Prevent Relapse in Recurrent Depression. *Journal of Consulting and Clinical Psychology*, 76(6), 966–978. <https://doi.org/10.1037/a0013786>
- Kuyken, W., Watkins, E., Holden, E., White, K., Taylor, R. S., Byford, S., ... Dalgleish, T. (2010). How does mindfulness-based cognitive therapy work? *Behaviour Research and Therapy*, 48, 1105–1112. <https://doi.org/10.1016/j.brat.2010.08.003>
- Leydon, G. M., Rodgers, L., & Kendrick, T. (2007). A qualitative study of patient views on discontinuing long-term selective serotonin reuptake inhibitors. *Family Practice*, 24(6), 570–575. <https://doi.org/10.1093/fampra/cmm069>
- Muñoz, R. F., & Mendelson, T. (2005). Toward evidence-based interventions for diverse populations: The San Francisco General Hospital prevention and treatment manuals. *J Consult Clin Psychol*, 73(5), 790-799.
- Otto, M. W., McHugh, R. K., Simon, N. M., Farach, F. J., Worthington, J. J., & Pollack, M. H. (2010). Efficacy of CBT for benzodiazepine discontinuation in patients with panic disorder: Further evaluation. *Behaviour Research and Therapy*, 48(8), 720–727. <https://doi.org/10.1016/J.BRAT.2010.04.002>
- Powers, M. B., Zum Vorde Sive Vording, M. B., & Emmelkamp, P. M. (2009). Acceptance and commitment therapy: a meta-analytic review. *Psychother Psychosom*, 78(2), 73-80.
- Schofield, P., Crosland, A., Waheed, W., Aseem, S., Gask, L., Wallace, A., ... Tylee, A. (2011). Patients' views of antidepressants: From first experiences to becoming expert. *British Journal of General Practice*, 61(585), 142–148. <https://doi.org/10.3399/bjgp11X567045>
- Swain, J., Hancock, K., Hainsworth, C., & Bowman, J. (2013). Acceptance and commitment therapy in the treatment of anxiety: a systematic review. *Clin Psychol Rev*, 33(8), 965-978.
- Verbeek-Heida, P. M., & Mathot, E. F. (2006). Better safe than sorry — why patients prefer to stop using selective serotonin reuptake inhibitor (SSRI) antidepressants but are afraid to do so: results of a qualitative study. *Chronic Illness*, 2(2), 133–142. <https://doi.org/10.1179/174592006X111003>
